# Supplementary material for: Pangenome Evidence for Higher Codon Usage Bias and Stronger Translational Selection in Core Genes of Escherichia coli
Source: Front Microbiol. 2016 Aug 3;7:1180. doi: 10.3389/fmicb.2016.01180 (PMC4971109; doi:10.3389/fmicb.2016.01180)
Supplement: Supplementary file 6 [file DataSheet6.XLS]

## Sheet: Table S6
Table S6 Correlation between the first axis of COA and 65 factors.
Codon usage indice or codon	All Genes					Representative Genes
	Strain-specific genes	Lowly-shared genes	Moderately-shared genes	Highly-shared genes	Core genes	Strain-specific genes	Lowly-shared genes	Moderately-shared genes	Highly-shared genes	Core genes
CAI	0.63*	0.68*	0.65*	0.89*	0.94*	0.64*	0.68*	0.70*	0.88*	0.94*
CDC	0.36*	0.36*	0.36*	0.37*	0.50*	0.38*	0.37*	0.37*	0.37*	0.49*
Nc	0.45*	0.64*	0.73*	0.79*	0.77*	0.44*	0.60*	0.71*	0.79*	0.76*
Nc'	0.60*	0.67*	0.73*	0.77*	0.78*	0.61*	0.66*	0.74*	0.78*	0.78*
GC	0.86*	0.86*	0.82*	0.47*	0.17*	0.85*	0.85*	0.80*	0.48*	0.17*
GC3	0.92*	0.92*	0.91*	0.61*	0.28*	0.92*	0.92*	0.90*	0.62*	0.28*
UUU	0.35*	0.26*	0.34*	0.51*	0.57*	0.34*	0.25*	0.30*	0.51*	0.57*
UCU	0.42*	0.38*	0.30*	0.16*	0.38*	0.44*	0.37*	0.25*	0.14*	0.39*
UAU	0.37*	0.37*	0.34*	0.39*	0.39*	0.37*	0.37*	0.35*	0.39*	0.39*
UGU	0.22*	0.30*	0.37*	0.21*	0.15*	0.25*	0.28*	0.41*	0.23*	0.14*
UUC	0.36*	0.26*	0.34*	0.50*	0.57*	0.34*	0.25*	0.30*	0.50*	0.57*
UCC	0.21*	0.23*	0.32*	0.33*	0.42*	0.22*	0.25*	0.37*	0.33*	0.42*
UAC	0.34*	0.37*	0.35*	0.40*	0.39*	0.34*	0.36*	0.36*	0.40*	0.39*
UGC	0.19*	0.26*	0.32*	0.13*	0.10*	0.22*	0.25*	0.34*	0.17*	0.09*
UUA	0.66*	0.65*	0.71*	0.62*	0.58*	0.65*	0.64*	0.68*	0.61*	0.57*
UCA	0.38*	0.41*	0.43*	0.37*	0.28*	0.40*	0.43*	0.46*	0.36*	0.28*
UUG	0.34*	0.36*	0.35*	0.34*	0.47*	0.31*	0.33*	0.30*	0.35*	0.47*
UCG	0.23*	0.25*	0.22*	0.01	0.26*	0.24*	0.27*	0.17*	0.03	0.26*
CUU	0.36*	0.35*	0.37*	0.34*	0.30*	0.36*	0.37*	0.39*	0.34*	0.31*
CCU	0.41*	0.37*	0.42*	0.36*	0.24*	0.40*	0.36*	0.42*	0.37*	0.24*
CAU	0.26*	0.26*	0.34*	0.36*	0.43*	0.27*	0.24*	0.34*	0.37*	0.44*
CGU	0.12*	0.03*	0.10*	0.40*	0.58*	0.13*	0.06*	0.16*	0.37*	0.57*
CUC	0.20*	0.10*	0.12*	0.04*	0.06*	0.20*	0.15*	0.15*	0.05	0.06*
CCC	0.12*	0.05*	0.14*	0.41*	0.55*	0.11*	0.09*	0.16*	0.40*	0.55*
CAC	0.28*	0.27*	0.33*	0.37*	0.42*	0.28*	0.27*	0.33*	0.38*	0.43*
CGC	0.52*	0.59*	0.52*	0.31*	0.07*	0.54*	0.60*	0.56*	0.33*	0.07*
CUA	0.45*	0.34*	0.40*	0.31*	0.36*	0.44*	0.34*	0.35*	0.33*	0.37*
CCA	0.39*	0.41*	0.53*	0.19*	0.08*	0.36*	0.42*	0.48*	0.21*	0.09*
CAA	0.56*	0.54*	0.52*	0.36*	0.38*	0.56*	0.51*	0.47*	0.35*	0.37*
CGA	0.20*	0.34*	0.35*	0.46*	0.51*	0.23*	0.32*	0.34*	0.45*	0.52*
CUG	0.77*	0.78*	0.81*	0.75*	0.74*	0.76*	0.77*	0.78*	0.75*	0.74*
CCG	0.56*	0.62*	0.75*	0.62*	0.51*	0.53*	0.61*	0.75*	0.63*	0.51*
CAG	0.58*	0.54*	0.53*	0.37*	0.38*	0.57*	0.51*	0.48*	0.37*	0.37*
CGG	0.32*	0.17*	0.16*	0.42*	0.57*	0.30*	0.20*	0.14*	0.40*	0.57*
AUU	0.23*	0.20*	0.09*	0.22*	0.31*	0.20*	0.14*	0.02	0.22*	0.32*
ACU	0.46*	0.41*	0.40*	0.08*	0.27*	0.46*	0.42*	0.39*	0.04	0.28*
AAU	0.46*	0.51*	0.57*	0.57*	0.56*	0.46*	0.50*	0.56*	0.57*	0.56*
AGU	0.16*	0.26*	0.26*	0.42*	0.48*	0.17*	0.27*	0.27*	0.41*	0.48*
AUC	0.55*	0.54*	0.51*	0.49*	0.49*	0.56*	0.52*	0.52*	0.50*	0.50*
ACC	0.44*	0.49*	0.46*	0.45*	0.42*	0.46*	0.54*	0.53*	0.46*	0.42*
AAC	0.46*	0.51*	0.54*	0.57*	0.57*	0.45*	0.50*	0.54*	0.57*	0.57*
AGC	0.45*	0.46*	0.35*	0.24*	0.03*	0.46*	0.45*	0.39*	0.24*	0.03
AUA	0.40*	0.48*	0.52*	0.51*	0.46*	0.46*	0.51*	0.61*	0.52*	0.46*
ACA	0.50*	0.49*	0.52*	0.47*	0.39*	0.51*	0.54*	0.52*	0.46*	0.40*
AAA	0.17*	0.13*	0.10*	0.05*	0.08*	0.15*	0.10*	0.04	0.05	0.07*
AGA	0.58*	0.51*	0.55*	0.49*	0.33*	0.58*	0.54*	0.58*	0.51*	0.32*
ACG	0.43*	0.24*	0.30*	0.22*	0.42*	0.42*	0.26*	0.24*	0.20*	0.42*
AAG	0.15*	0.12*	0.09*	0.04*	0.07*	0.14*	0.09*	0.03	0.04	0.07*
AGG	0.21*	0.23*	0.22*	0.35*	0.29*	0.22*	0.24*	0.34*	0.34*	0.29*
GUU	0.42*	0.49*	0.48*	0.12*	0.20*	0.40*	0.48*	0.47*	0.13*	0.21*
GCU	0.45*	0.48*	0.43*	0.04*	0.20*	0.44*	0.49*	0.44*	0.04	0.19*
GAU	0.37*	0.45*	0.32*	0.32*	0.38*	0.34*	0.43*	0.28*	0.32*	0.38*
GGU	0.08*	0.21*	0.27*	0.19*	0.42*	0.09*	0.24*	0.27*	0.17*	0.43*
GUC	0.26*	0.17*	0.11*	0.08*	0.21*	0.26*	0.20*	0.13*	0.08*	0.21*
GCC	0.43*	0.35*	0.31*	0	0.17*	0.43*	0.38*	0.34*	0.01	0.16*
GAC	0.37*	0.45*	0.32*	0.34*	0.38*	0.35*	0.43*	0.28*	0.33*	0.38*
GGC	0.41*	0.48*	0.50*	0.39*	0.23*	0.43*	0.50*	0.54*	0.40*	0.23*
GUA	0.43*	0.39*	0.33*	0.06*	0.10*	0.43*	0.41*	0.31*	0.09*	0.11*
GCA	0.46*	0.41*	0.43*	0.20*	0.02*	0.47*	0.42*	0.42*	0.20*	0.01
GAA	0.16*	0.17*	0.22*	0.05*	0.23*	0.15*	0.16*	0.19*	0.04	0.23*
GGA	0.37*	0.39*	0.29*	0.53*	0.54*	0.37*	0.41*	0.30*	0.53*	0.53*
GUG	0.52*	0.59*	0.56*	0.19*	0.09*	0.50*	0.57*	0.54*	0.21*	0.09*
GCG	0.47*	0.44*	0.44*	0.17*	0.04*	0.47*	0.46*	0.43*	0.17*	0.04*
GAG	0.15*	0.18*	0.22*	0.05*	0.23*	0.15*	0.16*	0.19*	0.04	0.23*
GGG	0	0.06*	0.01	0.27*	0.44*	0.03	0.07*	0.02	0.26*	0.44*
* P-value<0.05.
